# Supplementary material
Source: Springer Nature journal article supplement (https://www.springermedizin.de/resource/supplementary/13024_2014_532_MOESM3_ESM.pdf/9644330)

A

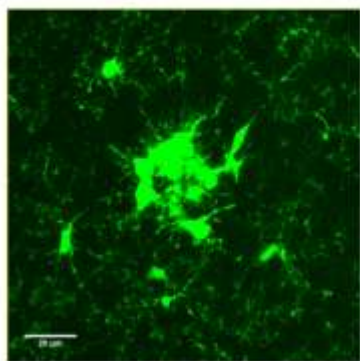

B

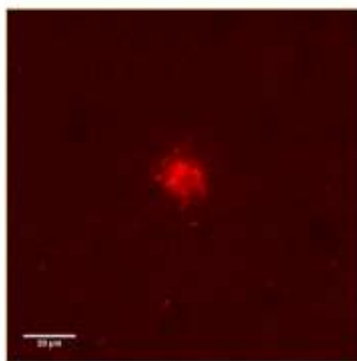

C

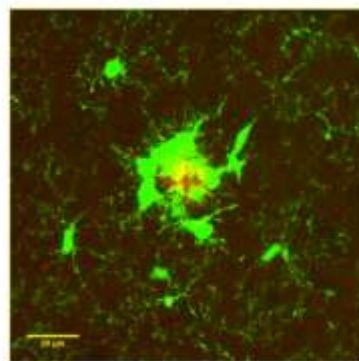

D

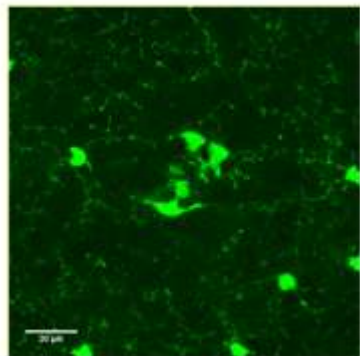

E

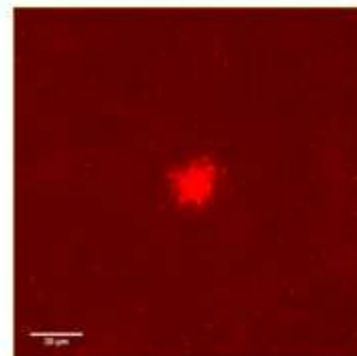

F

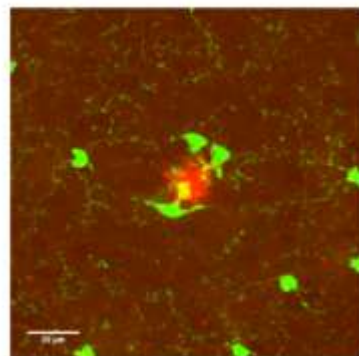

G

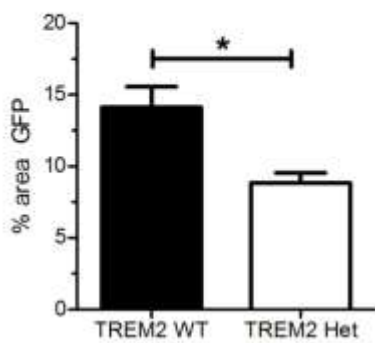

H

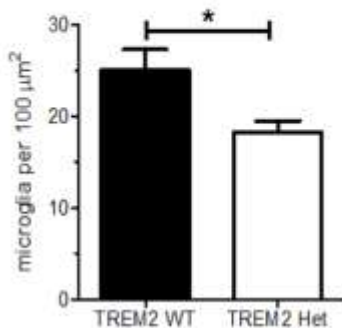

I

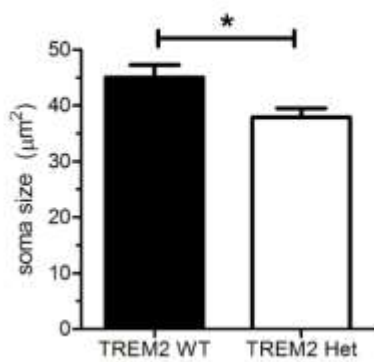

Supplement: MOESM3 [file 9644330]
